# Supplementary material for: Time Trends in Spain from 2001 to 2018 in the Incidence and Outcomes of Hospitalization for Urinary Tract Infections in Patients with Type 2 Diabetes Mellitus
Source: PubMed Central journal article supplement (PMC7765668; doi:10.3390/ijerph17249427), 2020-12-16
Supplement: ijerph-17-09427-s001.pdf [file ijerph-17-09427-s001.pdf]

**Supplementary Table S1. ICD 9 MC and ICD 10 MC codes used to identify diagnosis and procedures used in this investigation.**

| <b>DIAGNOSIS/PROCEDURES</b>           | <b>ICD 9 CM</b>                                                                       | <b>ICD 10 CM</b>                                                                 |
|---------------------------------------|---------------------------------------------------------------------------------------|----------------------------------------------------------------------------------|
| <i>Enterococcus</i>                   | 041.04                                                                                | B95.2; A40.2; A41.81                                                             |
| <i>Staphylococcus aureus</i>          | 041.1; 041.10; 041.11;<br>041.12; 041.19; 038.1;<br>038.10; 038.11; 038.12;<br>038.19 | B95.6; B95.61; B95.62;<br>B95.7; B95.8; A41.0;<br>A41.1; A41.2 A41.01;<br>A41.02 |
| <i>Klebsiella pneumoniae</i>          | 041.3                                                                                 | B96.1                                                                            |
| <i>Escherichia coli</i>               | <b>041.4; 041.41; 041.42;</b><br><b>041.43; 041.49; 038.42</b>                        | <b>B96.21; B96.22; B96.23;</b><br><b>B96.20 B96.29; A41.51</b>                   |
| <i>Proteus (mirabilis) (morganii)</i> | 041.6                                                                                 | B96.4                                                                            |
| <i>Pseudomonas aeruginosa</i>         | 041.7; 038.43                                                                         | B96.5; A41.52                                                                    |
| Urinary catheter                      | 57.94; 57.95                                                                          | 0T9B70Z; 0T9B80Z;<br>0T2BX0Z                                                     |

**Supplementary Table S2. Variables associated with in-hospital mortality in hospital admissions of patients with a principal diagnosis of urinary tract infection according to sex in Spain (2001-2018).**

|                               | <b>Men</b>         | <b>Women</b>       | <b>Both</b>        |
|-------------------------------|--------------------|--------------------|--------------------|
| Female sex                    | NA                 | NA                 | 1.06(1.04-1.08)    |
| <50 years                     | 1                  | 1                  | 1                  |
| 50-64 years                   | 2.27(1.95-2.66)    | 5.84(5-6.81)       | 4.21(3.77-4.7)     |
| 65-74 years                   | 4.25(3.68-4.92)    | 11.73(10.15-13.54) | 8.14(7.35-9.02)    |
| 75-84 years                   | 7.68(6.67-8.84)    | 22.95(20-26.34)    | 15.29(13.85-16.87) |
| >85 years                     | 14.29(12.41-16.45) | 41.25(35.97-47.29) | 27.92(25.31-30.8)  |
| CCI =0                        | 1                  | 1                  | 1                  |
| CCI 1-2                       | 1.76(1.68-1.84)    | 1.64(1.59-1.7)     | 1.69(1.65-1.74)    |
| CCI>2                         | 2.59(2.47-2.71)    | 2.31(2.23-2.41)    | 2.43(2.36-2.51)    |
| Urinary catheter              | 0.71(0.66-0.76)    | 1.13(1.05-1.21)    | 0.87(0.83-0.92)    |
| <i>Staphylococcus aureus</i>  | 1.47(1.35-1.61)    | 1.74(1.59-1.9)     | 1.59(1.5-1.7)      |
| <i>Klebsiella pneumoniae</i>  | 0.75(0.68-0.81)    | 0.78(0.72-0.83)    | 0.77(0.73-0.81)    |
| <i>Escherichia coli</i>       | 0.52(0.49-0.54)    | 0.47(0.45-0.49)    | 0.49(0.47-0.5)     |
| <i>Pseudomonas aeruginosa</i> | 0.75(0.7-0.81)     | 0.82(0.75-0.9)     | 0.86(0.81-0.91)    |
| Year                          | 0.92(0.91-0.93)    | 0.94(0.94-0.95)    | 0.93(0.93-0.94)    |
| Diabetes                      | 0.95(0.90-1.02)    | 0.99(0.93-1.04)    | 0.97(0.91-1.01)    |
